# Supplementary material
Source: Springer Nature journal article supplement (https://www.springermedizin.de/resource/supplementary/12943_2013_1213_MOESM2_ESM.pdf/9552406)

extracellular

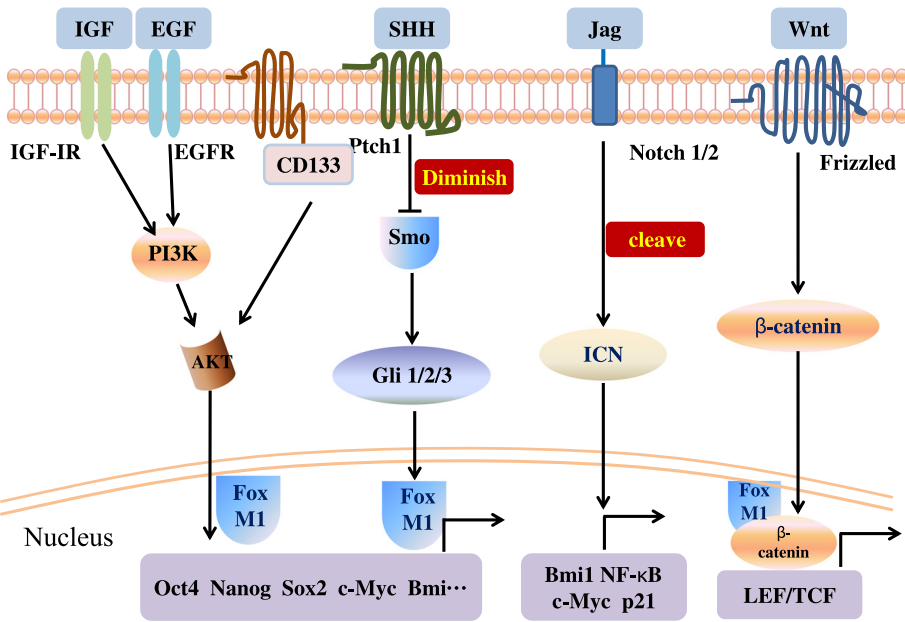

Supplement: MOESM2 [file 9552406]
